# Supplementary material
Source: MDPI journal article supplement (https://www.mdpi.com/2073-445X/8/9/132)
Supplement: s1 [file s1]

# Integrating Participatory Methods and Remote Sensing to Enhance Understanding of Ecosystem Service Dynamics Across Scales

Jennifer Hodbod <sup>1,\*</sup>, Emma Tebbs <sup>2</sup>, Kristofer Chan <sup>2</sup> and Shubhechha Sharma <sup>1</sup>

<sup>1</sup> Department of Community Sustainability, Michigan State University, East Lansing, MI 48824. USA.

<sup>2</sup> Department of Geography, King's College London, WC2B 4BG, London, United Kingdom.

\* Correspondence: jhodbod@msu.edu; Tel.: +1 5173550312

## 1. Ecosystem Services expected to be found in the region

**Table S1.** Ecosystem services found in the Nyangatom woreda, based on literature, prior research, and transect walks within the region, to be annotated during focus groups.

| ESS cat      | Sub-cat                            | Indicator                                                       | ✓                                                        | Importance<br>(None/ Low / Medium/ High) | Capacity of land use category (Rank) |       |          |        |       |       |       |           |           |  | Other landscape features (e.g. roads)? |
|--------------|------------------------------------|-----------------------------------------------------------------|----------------------------------------------------------|------------------------------------------|--------------------------------------|-------|----------|--------|-------|-------|-------|-----------|-----------|--|----------------------------------------|
|              |                                    |                                                                 |                                                          |                                          | Bare ground                          | Urban | Cropland | Forest | River | Ponds | Lakes | Grassland | Shrubland |  |                                        |
| Provisioning | Food (including meat, blood, milk) | Dry season grazing - cattle                                     |                                                          |                                          |                                      |       |          |        |       |       |       |           |           |  |                                        |
|              |                                    | Dry season grazing - sheep and goats                            |                                                          |                                          |                                      |       |          |        |       |       |       |           |           |  |                                        |
|              |                                    | Wet season grazing - cattle                                     |                                                          |                                          |                                      |       |          |        |       |       |       |           |           |  |                                        |
|              |                                    | Wet season grazing - sheep and goats                            |                                                          |                                          |                                      |       |          |        |       |       |       |           |           |  |                                        |
|              |                                    | Poultry                                                         |                                                          |                                          |                                      |       |          |        |       |       |       |           |           |  |                                        |
|              |                                    | Subsistence Crops – Sorghum, Maize, Cowpeas                     |                                                          |                                          |                                      |       |          |        |       |       |       |           |           |  |                                        |
|              |                                    | Commercial Crops – Sugar, Cotton                                |                                                          |                                          |                                      |       |          |        |       |       |       |           |           |  |                                        |
|              |                                    | Fish                                                            |                                                          |                                          |                                      |       |          |        |       |       |       |           |           |  |                                        |
|              |                                    | Crustaceans                                                     |                                                          |                                          |                                      |       |          |        |       |       |       |           |           |  |                                        |
|              |                                    | Honey                                                           |                                                          |                                          |                                      |       |          |        |       |       |       |           |           |  |                                        |
|              |                                    | Wild foods (plants)                                             |                                                          |                                          |                                      |       |          |        |       |       |       |           |           |  |                                        |
|              |                                    | Bush meat (dikdik, antelope, porcupine, crocodile, guinea fowl) |                                                          |                                          |                                      |       |          |        |       |       |       |           |           |  |                                        |
|              |                                    | Other_____                                                      |                                                          |                                          |                                      |       |          |        |       |       |       |           |           |  |                                        |
|              |                                    | Fibre                                                           | Building materials - grass thatch for house              |                                          |                                      |       |          |        |       |       |       |           |           |  |                                        |
|              |                                    |                                                                 | Building materials - wood for house construction, fences |                                          |                                      |       |          |        |       |       |       |           |           |  |                                        |
|              |                                    |                                                                 |                                                          |                                          |                                      |       |          |        |       |       |       |           |           |  |                                        |
|              |                                    |                                                                 |                                                          |                                          |                                      |       |          |        |       |       |       |           |           |  |                                        |

---

|              |             |                                                |
|--------------|-------------|------------------------------------------------|
| Provisioning | Fuel        | Cut grass for animals                          |
|              |             | Materials for clothing                         |
|              |             | Wood for chairs and spoons                     |
|              |             | Firewood                                       |
|              |             | Grass                                          |
|              | Med         | Dung                                           |
|              |             | Charcoal                                       |
|              |             | Trees that you use for shade                   |
|              |             | Medicinal resources                            |
|              |             | Drinking water for people - natural            |
| Cultural     | Fresh water | Drinking water for people – man made           |
|              |             | Drinking water for animals - natural           |
|              |             | Drinking water for animals – man made          |
|              |             | Irrigation water - subsistence                 |
|              |             | Irrigation water - commercial                  |
|              | Salt        | Salt lick for animals                          |
|              |             | Emomket - salt for tobacco                     |
|              |             | Buffalo (meat; hide; whip                      |
|              |             | Elephant (ivory; heroic act);                  |
|              |             | Giraffe (dancing decoration);                  |
|              | Hunting     | Crocodiles (meat, eggs);                       |
|              |             | Lion (prestige);                               |
|              |             | Ostrich (cultural tradition, age sets);        |
|              |             | Leopards;                                      |
|              |             | Jackals;                                       |
|              | Recreation  | Other_____                                     |
|              |             | Where do the tourists visit?                   |
|              |             | Where do you go to feel relaxed?               |
|              |             | Where do you go swimming in the river for fun? |
|              |             |                                                |

---

---

|            |                  |                                                                               |
|------------|------------------|-------------------------------------------------------------------------------|
| Supporting | Identity         | What areas are important for your family?                                     |
|            |                  | What areas are important for the Nyangatom?                                   |
|            |                  | What areas are important for other groups?                                    |
|            | Knowledge        | Where are the schools?                                                        |
|            |                  | Are there any other places used for education?                                |
|            | Spiritual        | Where are the sites of spiritual importance?                                  |
|            | Insp             | Are there places you go to feel inspired?                                     |
|            | Aesthetic        | What do you think is the most beautiful place in the area?                    |
|            | Social relations | Are there any places used for talking with groups?                            |
|            |                  | Are there any places used for resolving conflict?                             |
|            | Sense of place   | Where is your home?                                                           |
|            | Heritage         | Where are the villages?                                                       |
| Regulating | Biodiversity     | Where are the highest number of <i>different</i> types of wild animals found? |
|            |                  | Where are the highest number of <i>different</i> types of wild plants found?  |
|            | Primary Prod     | Where is the most vegetation?                                                 |
|            | Air qual         | Dust                                                                          |

---

---

|            |                              |                                                                  |
|------------|------------------------------|------------------------------------------------------------------|
| Regulating | C storage                    | Trees                                                            |
|            | Moderation of extreme events | Are there places that are safe when the river floods? Or unsafe? |
|            |                              | Are there places that are safe when there are fires? Or unsafe?  |
|            |                              | Are there places that are safe when there are storms? Or unsafe? |
|            |                              | Are there places where there are landslides when it rains?       |
|            | Purif + reg                  | Where is the water cleanest?                                     |
|            | Reten                        | Does water pool on the surface?                                  |
|            | Erosion + fertility          | Where do crops grow best?                                        |
|            |                              | Where do crops grow worst?                                       |
|            |                              | Where does the soil wash away? (Gullies)                         |
|            | Pollination                  | Where is the best place to put hives?                            |
|            |                              | Where do you see the most bees?                                  |
|            | Biological control           | Where are the main pest outbreaks?<br>Locusts                    |
|            |                              | Where are the main pest outbreaks?<br>Worms                      |

---

## 2. Digitized Participatory Maps

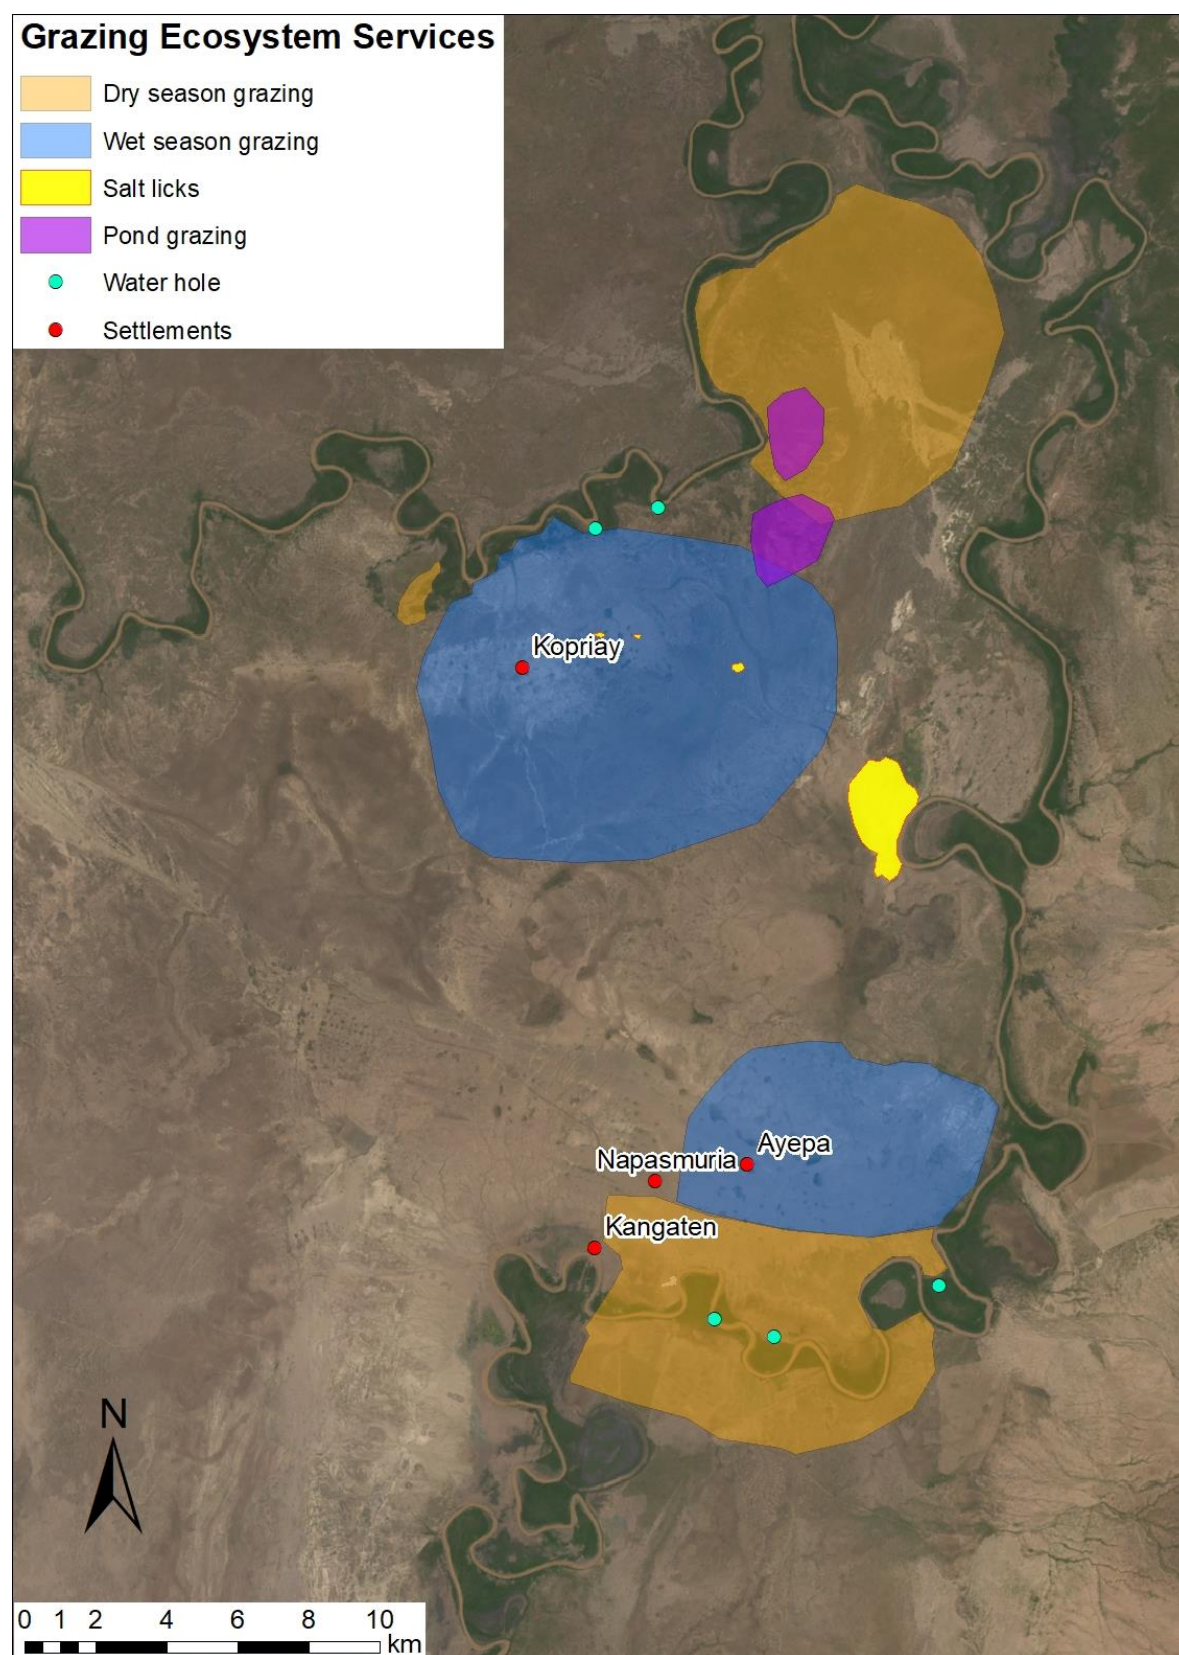

**Figure S1.** Digitized participatory map showing provisioning ecosystem services related to grazing, compiled from all six focus groups.

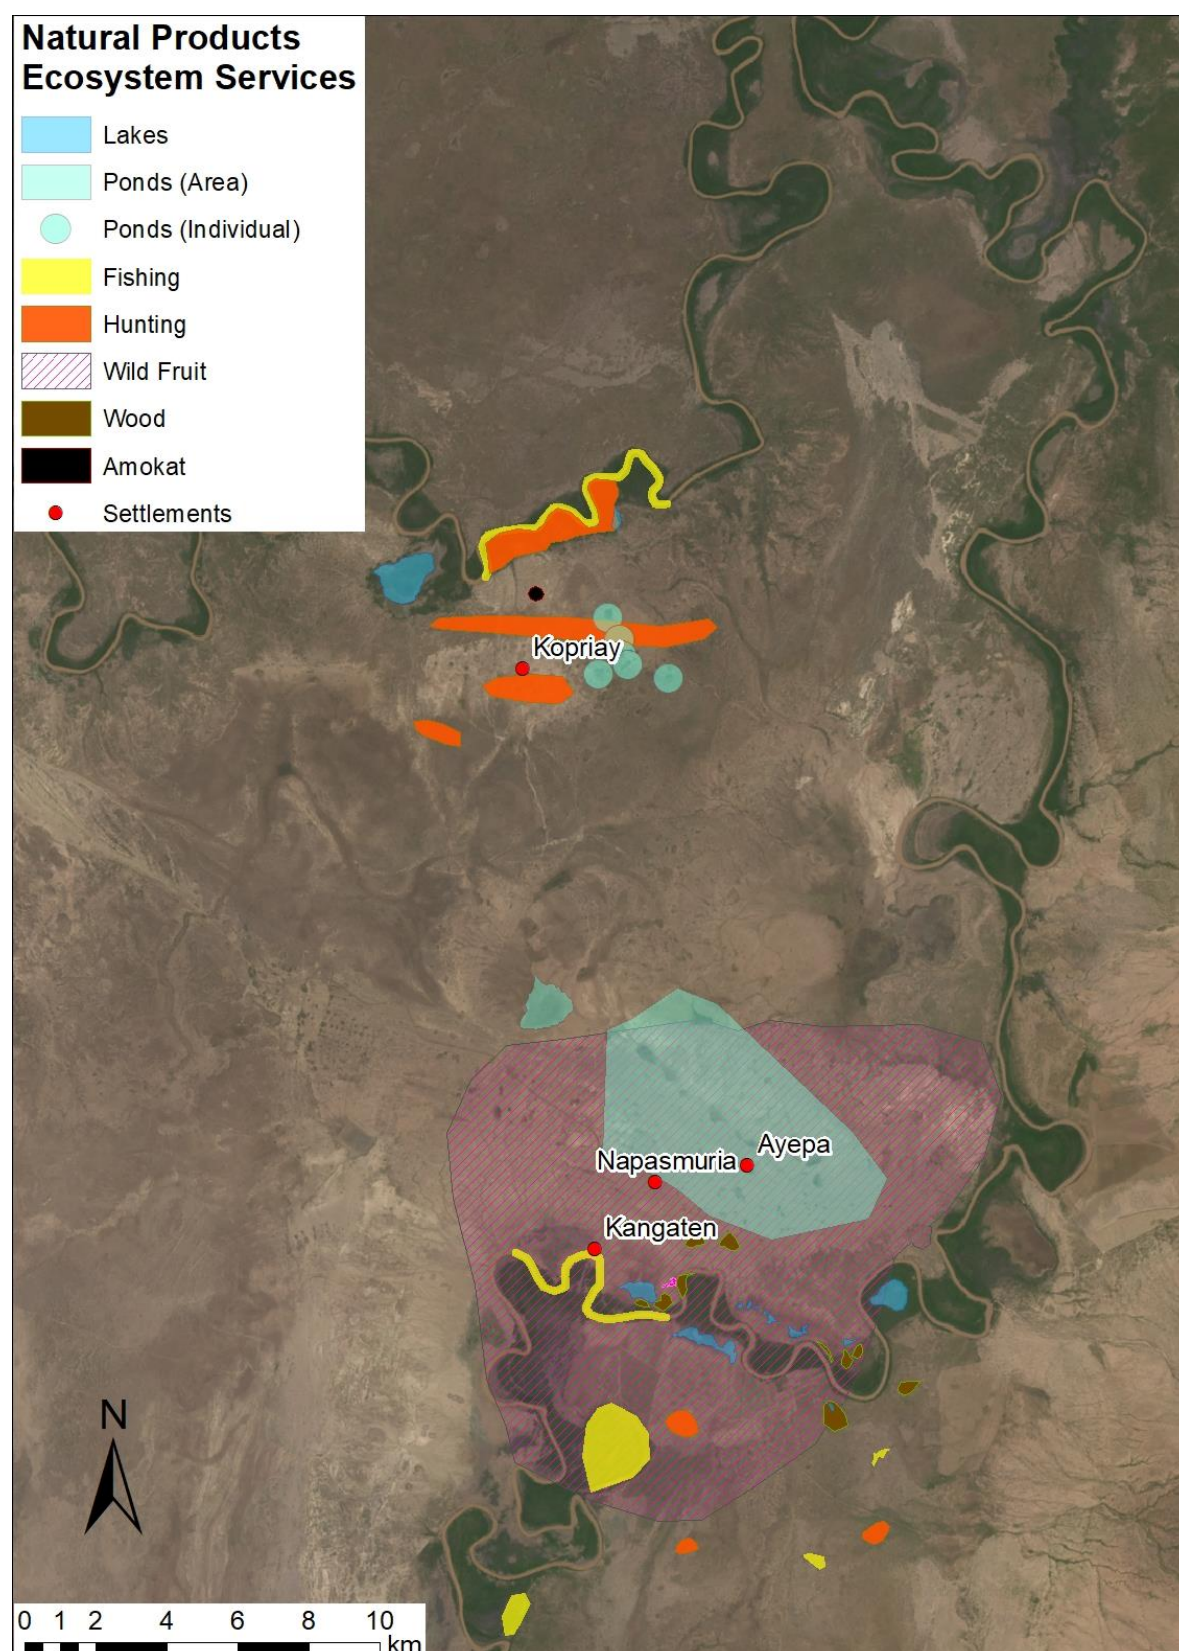

**Figure S2.** Digitized participatory map showing provisioning ecosystem services related to natural products (i.e. other than agriculture and grazing), compiled from all six focus groups.

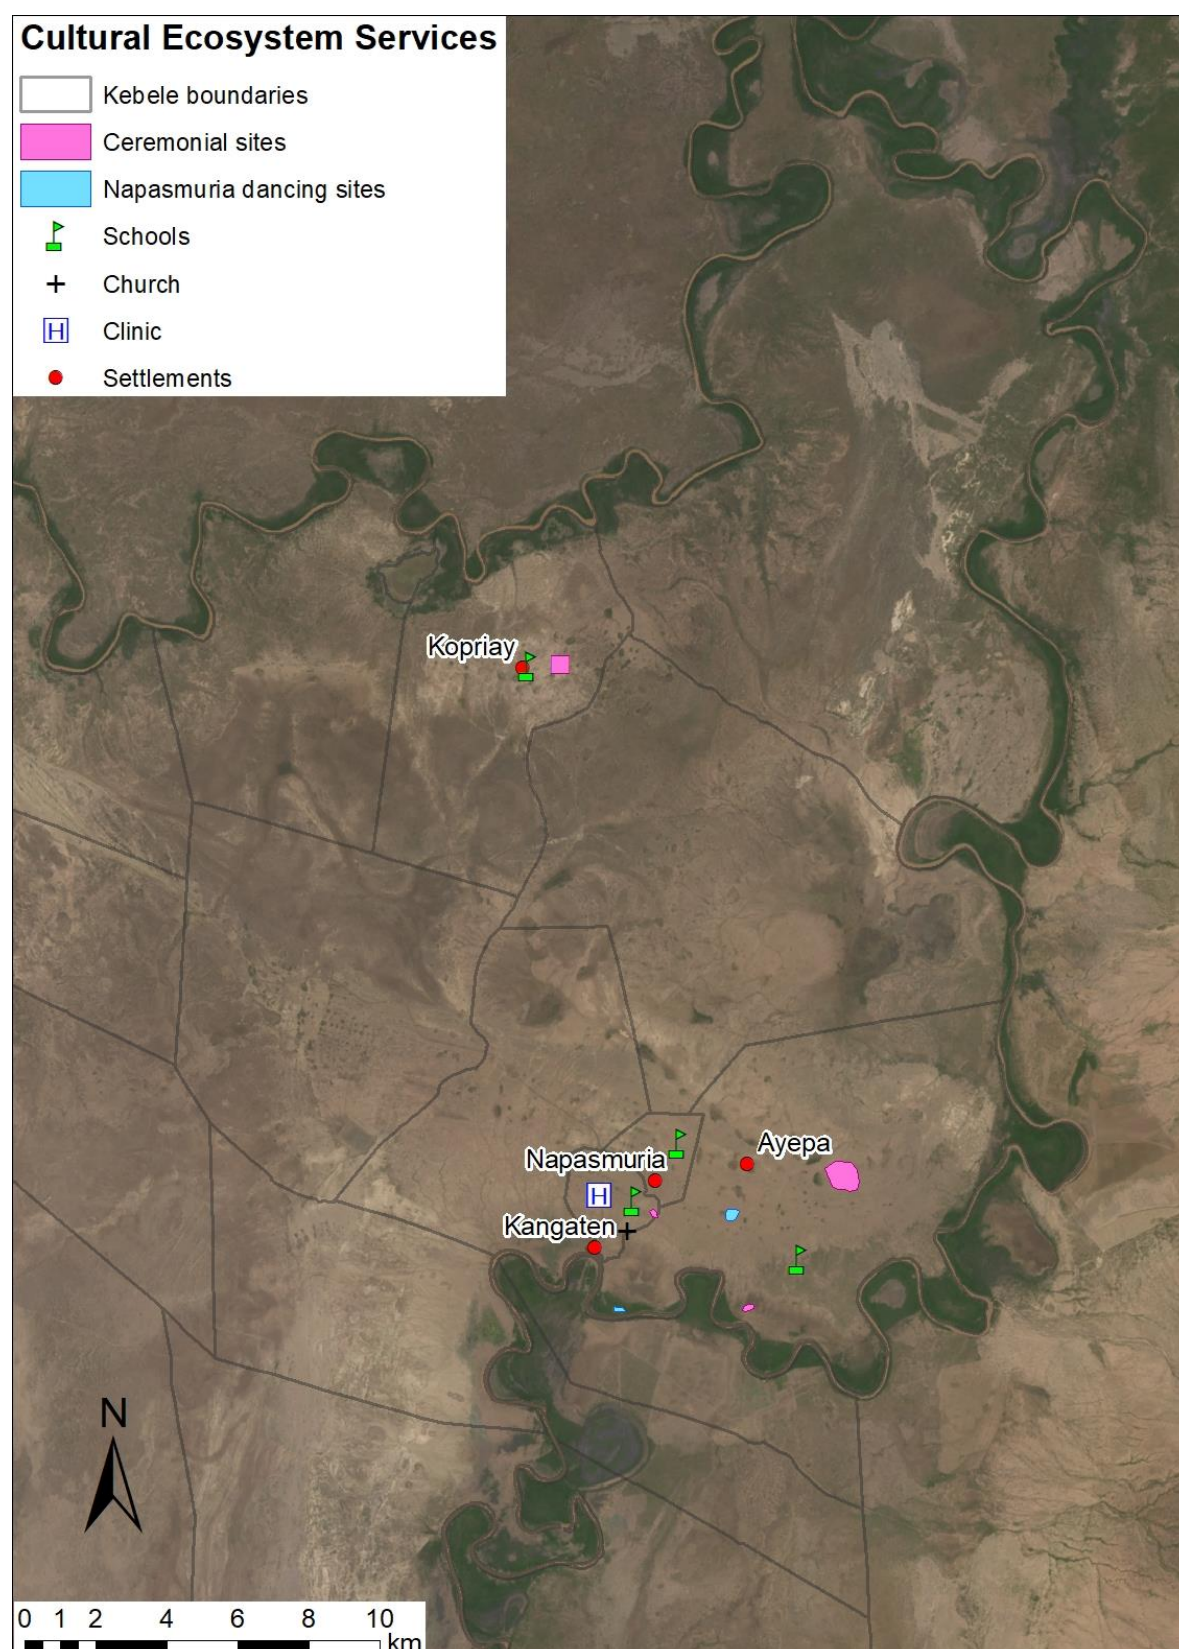

**Figure S3.** Digitized participatory map showing cultural ecosystem services, compiled from all six focus groups.

## 2. Land-use Classes

**Table S2.** Land cover categories and description.

| Land Cover       | Description                                                                              |
|------------------|------------------------------------------------------------------------------------------|
| <b>Water</b>     | Permanent standing surface water pixels                                                  |
| <b>Wetland</b>   | Mixed land/water pixels with greater than a third standing water or seasonally inundated |
| <b>Bare</b>      | Pixels with less than a third vegetation or other cover                                  |
| <b>Grassland</b> | Pixels predominantly covered by grass or herbaceous cover                                |
| <b>Shrubland</b> | Pixels predominantly covered by shrubs                                                   |
| <b>Forest</b>    | Pixels with greater than a third vegetation cover and tree* crown cover of at least 10%  |

\*Trees are defined as woody plants (typically single-stemmed) which typically reach a height of over 5m.

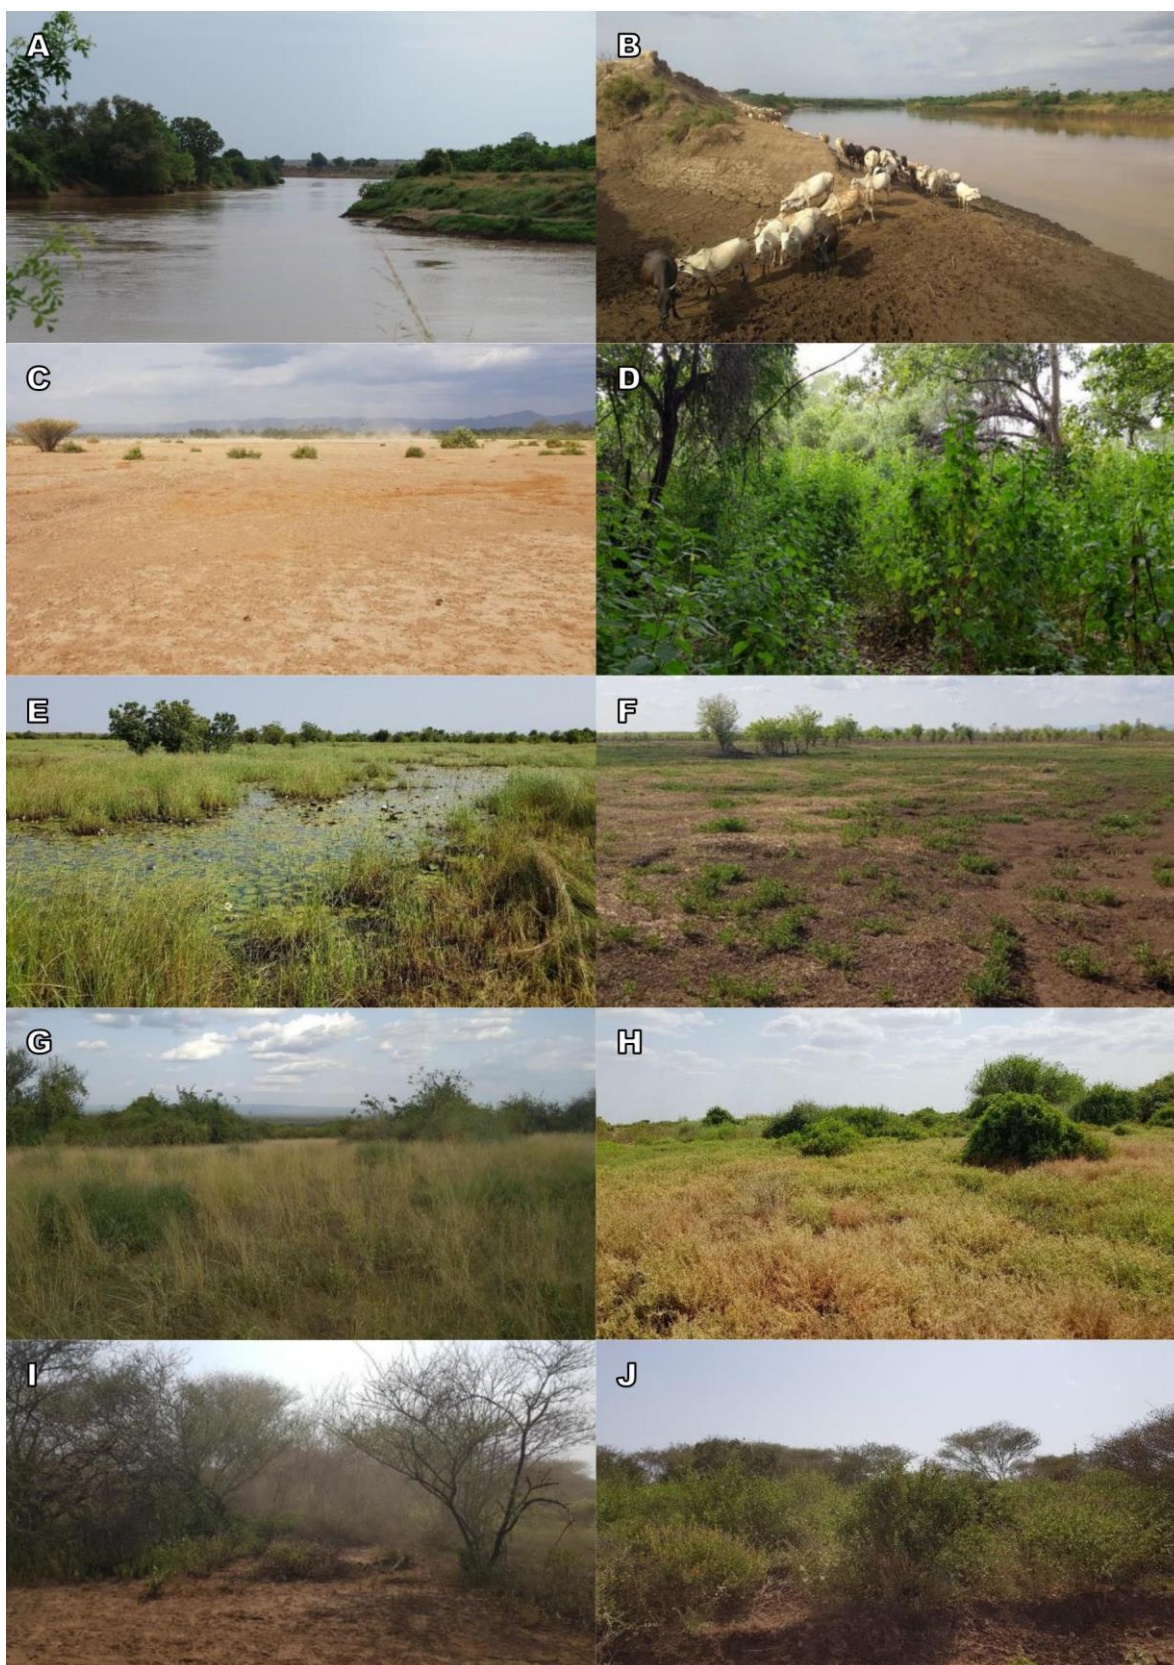

**Figure S4.** Photographs of representative Land Cover types. A & B – Water in the river; C – Bare; D – Forest; E & F – Wetland (Photographs taken from the same location, E – in the wet season, F – in the dry season); G & H – Grassland; I & J – Shrubland.

### 3. Land Cover Classification Accuracies

**Table S3.** Error Matrix for 2016-2019 Classified Land Cover.

| Classified Data                         | Reference Data |           |            |            |            |           | Classified Total | Producer's Accuracy | User's Accuracy |
|-----------------------------------------|----------------|-----------|------------|------------|------------|-----------|------------------|---------------------|-----------------|
|                                         | Water          | Wetland   | Bare       | Grassland  | Shrubland  | Forest    |                  |                     |                 |
| Water                                   | 201            | 7         | 0          | 0          | 0          | 0         | 208              | 98.0%               | 96.6%           |
| Wetland                                 | 3              | 43        | 0          | 1          | 0          | 0         | 47               | 70.5%               | 91.5%           |
| Bare                                    | 0              | 3         | 127        | 9          | 2          | 0         | 141              | 96.9%               | 90.1%           |
| Grassland                               | 0              | 1         | 4          | 87         | 9          | 0         | 101              | 86.1%               | 86.1%           |
| Scrubland                               | 0              | 4         | 0          | 4          | 107        | 6         | 121              | 81.1%               | 88.4%           |
| Forest                                  | 1              | 3         | 0          | 0          | 14         | 66        | 84               | 91.7%               | 78.6%           |
| <b>Total</b>                            | <b>205</b>     | <b>61</b> | <b>131</b> | <b>101</b> | <b>132</b> | <b>72</b> | <b>702</b>       |                     |                 |
| <b>Overall Classification Accuracy:</b> |                |           |            |            |            |           |                  |                     | 89.9%           |
| <b>Overall Kappa Statistic:</b>         |                |           |            |            |            |           |                  |                     | 0.874           |

**Table S4.** Error Matrix for 2001-2003 Classified Land Cover.

| Classified Data                         | Reference Data |           |           |           |           |           | Classified Total | Producer's Accuracy | User's Accuracy |
|-----------------------------------------|----------------|-----------|-----------|-----------|-----------|-----------|------------------|---------------------|-----------------|
|                                         | Water          | Wetland   | Bare      | Grassland | Shrubland | Forest    |                  |                     |                 |
| Water                                   | 162            | 5         | 0         | 0         | 0         | 0         | 167              | 99.4%               | 97.0%           |
| Wetland                                 | 1              | 18        | 0         | 0         | 0         | 0         | 19               | 75.0%               | 94.7%           |
| Bare                                    | 0              | 0         | 84        | 6         | 0         | 0         | 90               | 100%                | 93.3%           |
| Grassland                               | 0              | 0         | 0         | 33        | 5         | 0         | 38               | 82.5%               | 86.8%           |
| Scrubland                               | 0              | 1         | 0         | 1         | 49        | 2         | 53               | 87.5%               | 92.5%           |
| Forest                                  | 0              | 0         | 0         | 0         | 2         | 37        | 39               | 94.9%               | 94.9%           |
| <b>Total</b>                            | <b>163</b>     | <b>24</b> | <b>84</b> | <b>40</b> | <b>56</b> | <b>39</b> | <b>406</b>       |                     |                 |
| <b>Overall Classification Accuracy:</b> |                |           |           |           |           |           |                  |                     | 94.3%           |
| <b>Overall Kappa Statistic:</b>         |                |           |           |           |           |           |                  |                     | 0.924           |

### 4. Summary of ecosystem services mapped by each group

**Table S5.** ES listed by each focus group during the mapping activity (K = Kopriay, A = Ayepa, N = Napasmuria, W = Women, M = Men).

| Community              | Total number of ES | Provisioning | Regulating | Cultural |
|------------------------|--------------------|--------------|------------|----------|
| K-W                    | 14                 | 12           | 0          | 2        |
| K-M                    | 19                 | 14           | 0          | 5        |
| A-W                    | 21                 | 14           | 2          | 5        |
| A-M                    | 25                 | 16           | 2          | 7        |
| N-W                    | 24                 | 16           | 4          | 4        |
| N-M                    | 20                 | 8            | 2          | 10       |
| <b>Average</b>         | <b>21</b>          | <b>13</b>    | <b>3</b>   | <b>6</b> |
| <i>Average – Women</i> | 20                 | 14           | 3          | 4        |
| <i>Average – Men</i>   | 21                 | 13           | 2          | 7        |

However, there are some limitations to the robustness of this data – given time limitations, after the initial few annotations to the map, we purposely focused the conversation around provisioning ES first, then cultural, then regulating. Because we often finished the provisioning conversation earlier with the male focus groups, they had more time to discuss cultural services. There is also potentially some bias with the first focus group (Kopriay Women) taking longer as we were less practiced in our methodology, leading to lower scores.

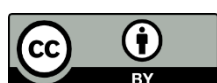

© 2019 by the authors. Submitted for possible open access publication under the terms and conditions of the Creative Commons Attribution (CC BY) license (<http://creativecommons.org/licenses/by/4.0/>).
